# Supplementary material for: First Insights on the Presence of the Unfolded Protein Response in Human Spermatozoa
Source: MDPI journal article supplement (doi:10.3390/ijms20215518), 2019-11-05

Figure 2

a.

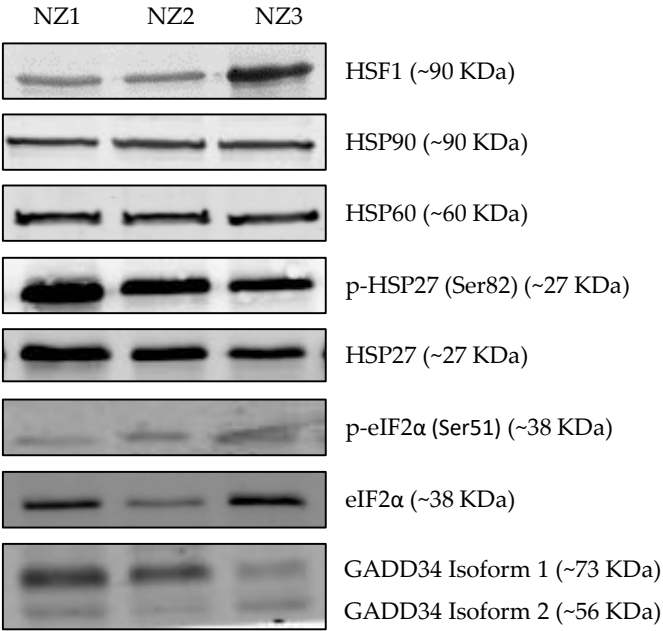

b.

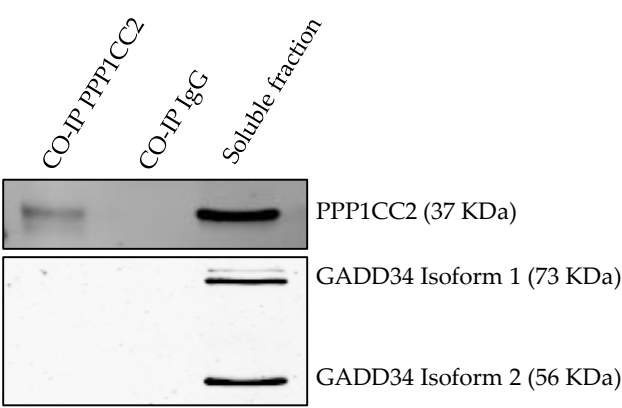

Figure 2.a – Original Images

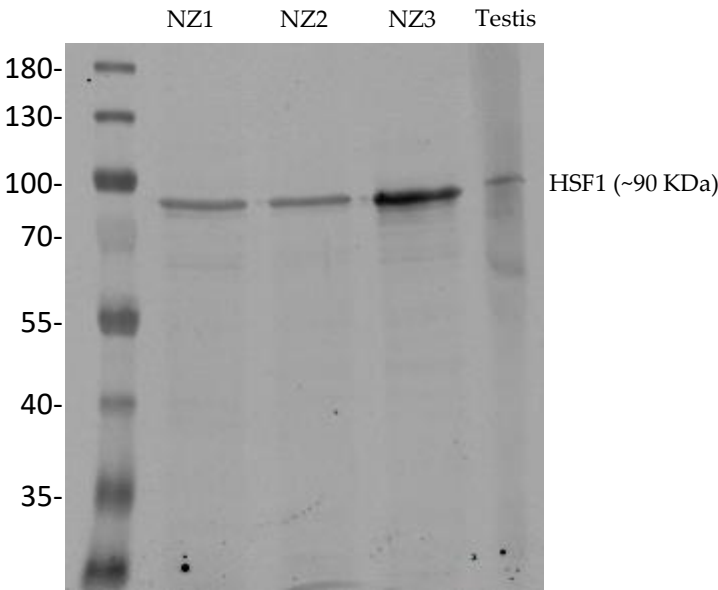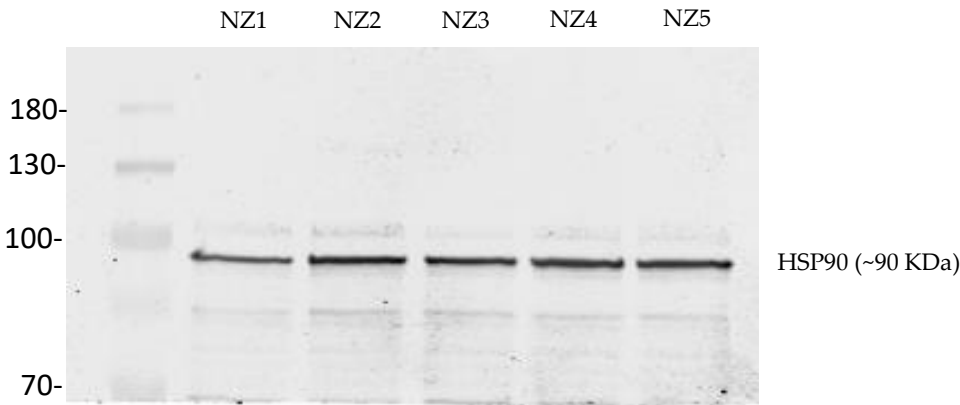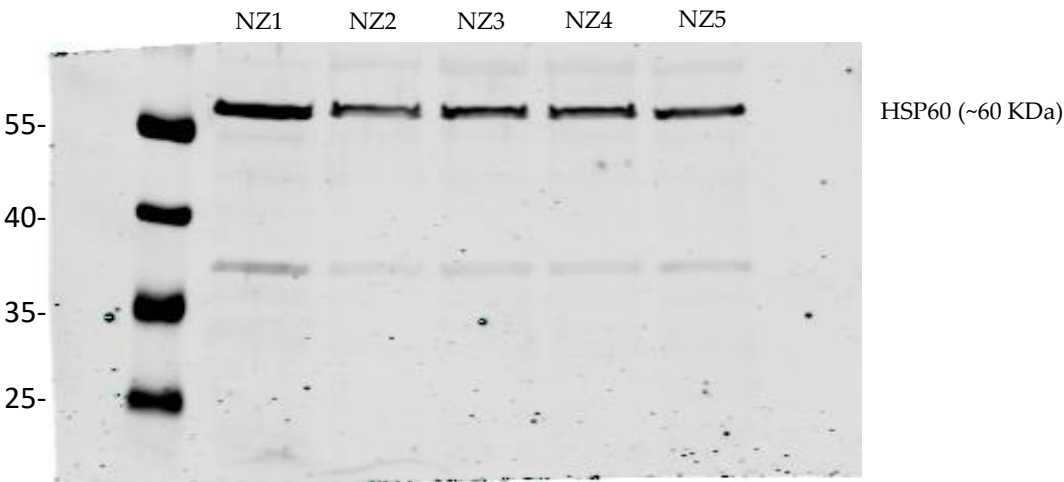

Figure 2.a – Original Images

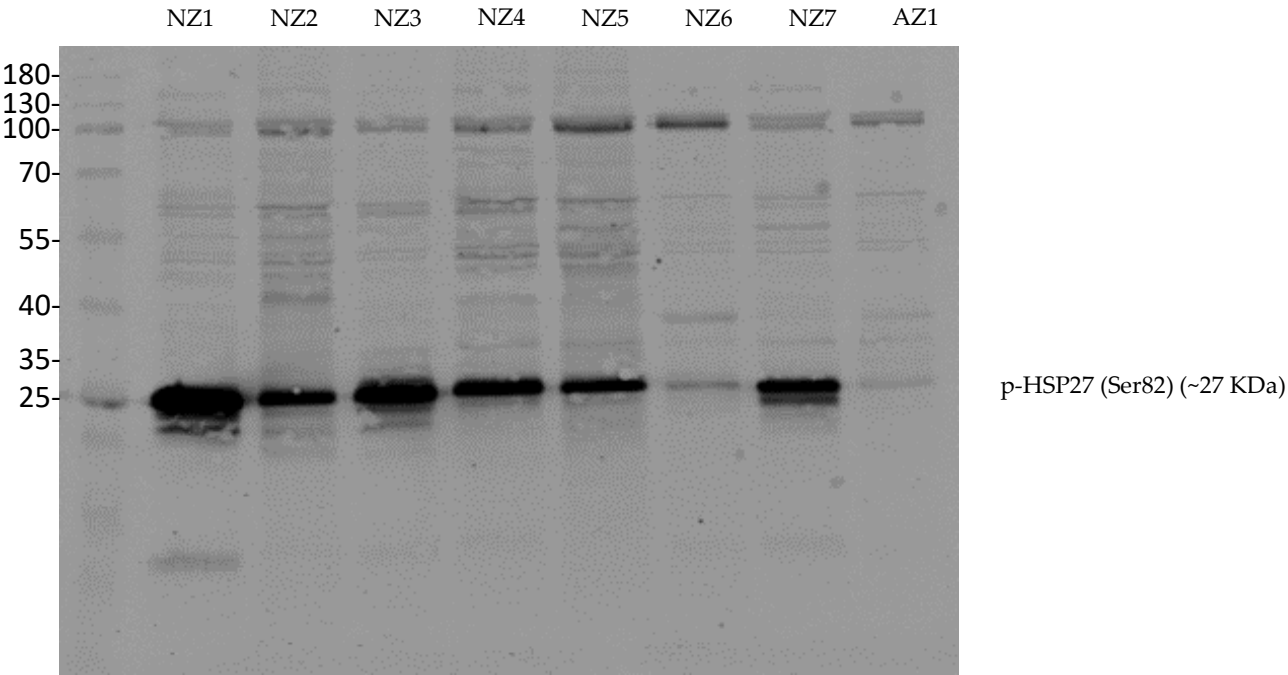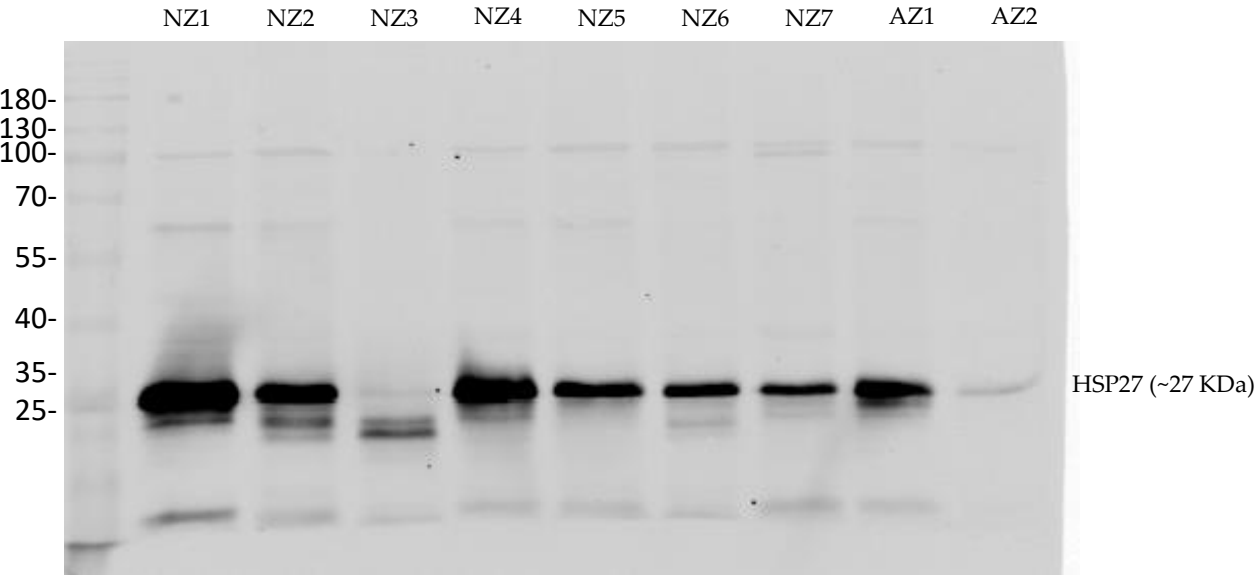

Figure 2.a – Original Images

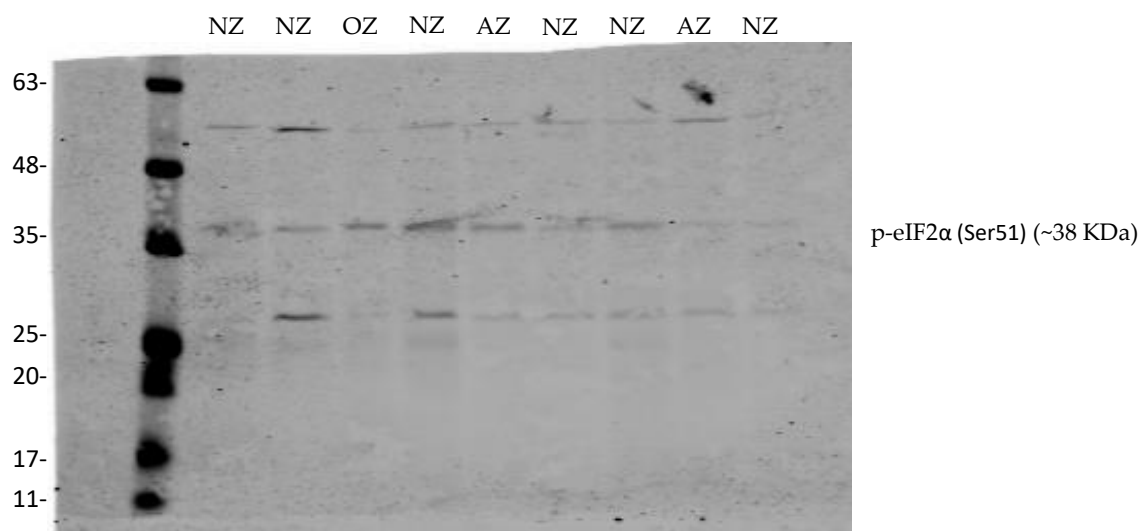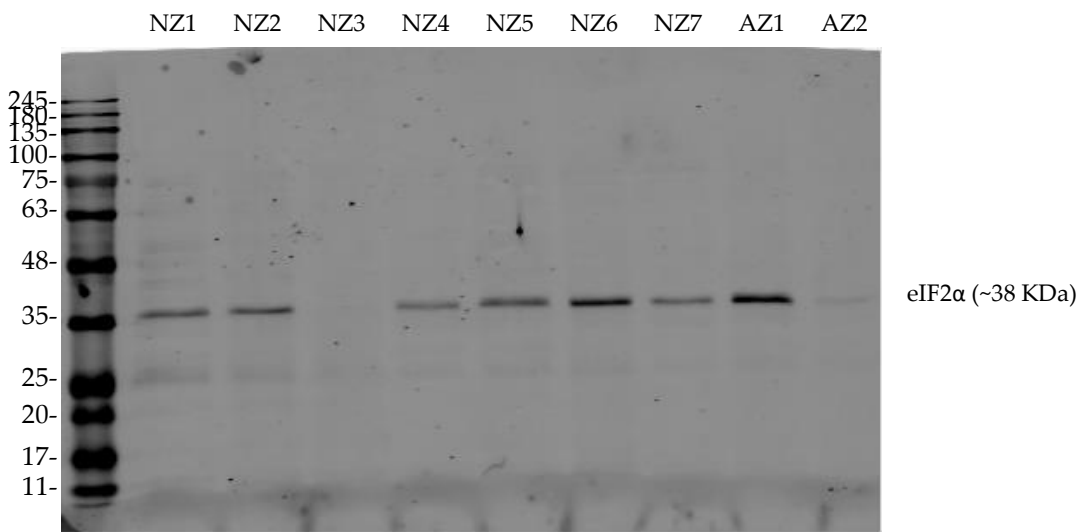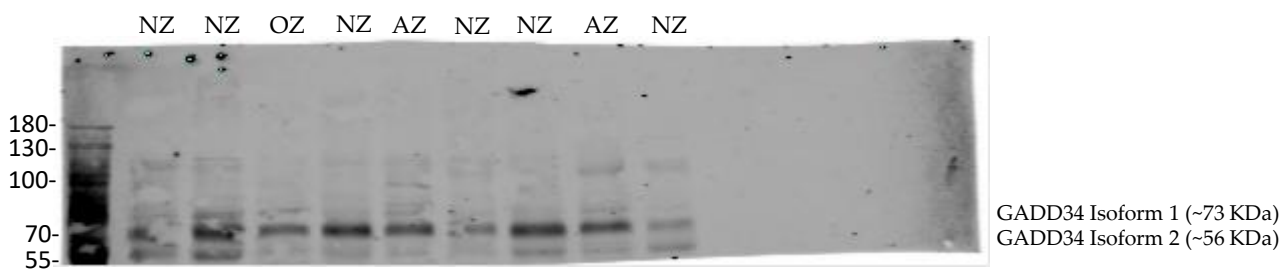

Figure 2.b – Original Images

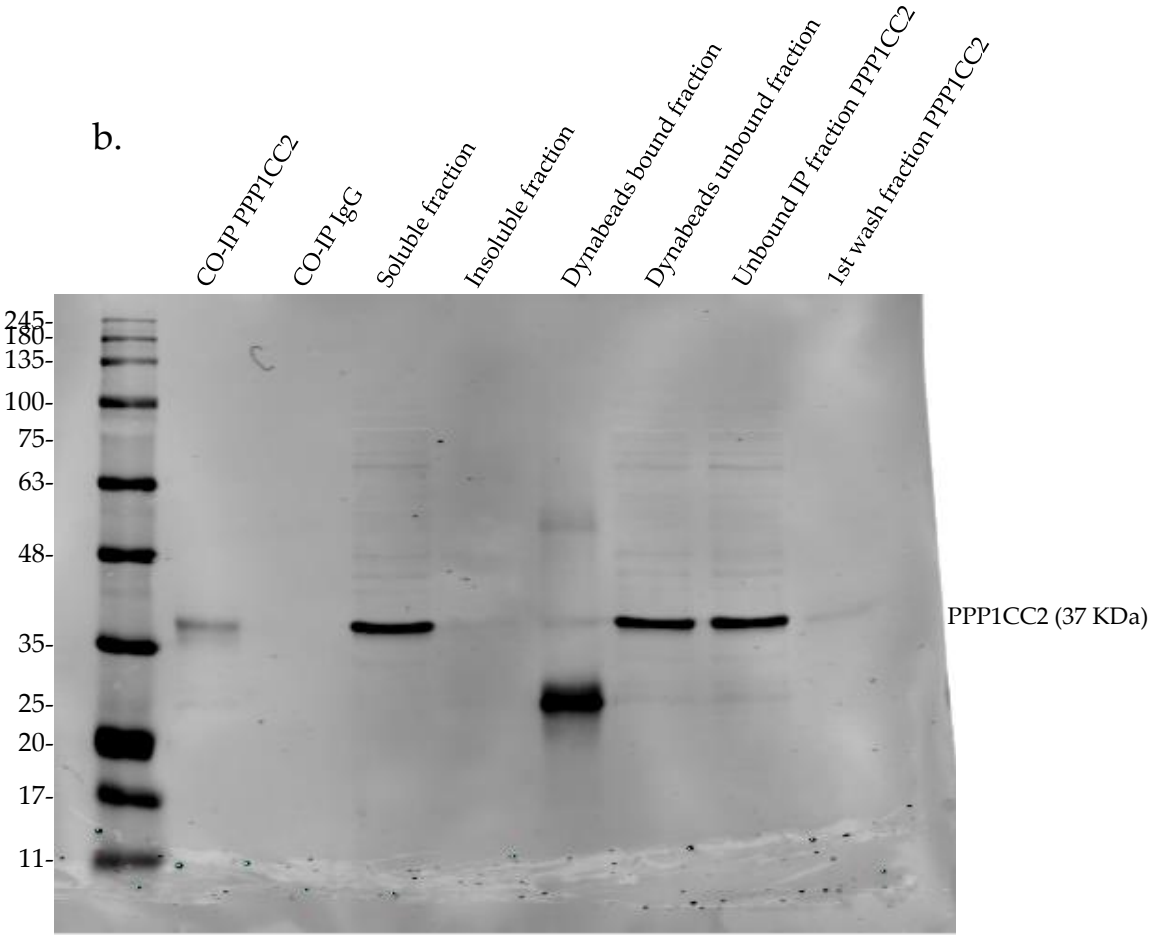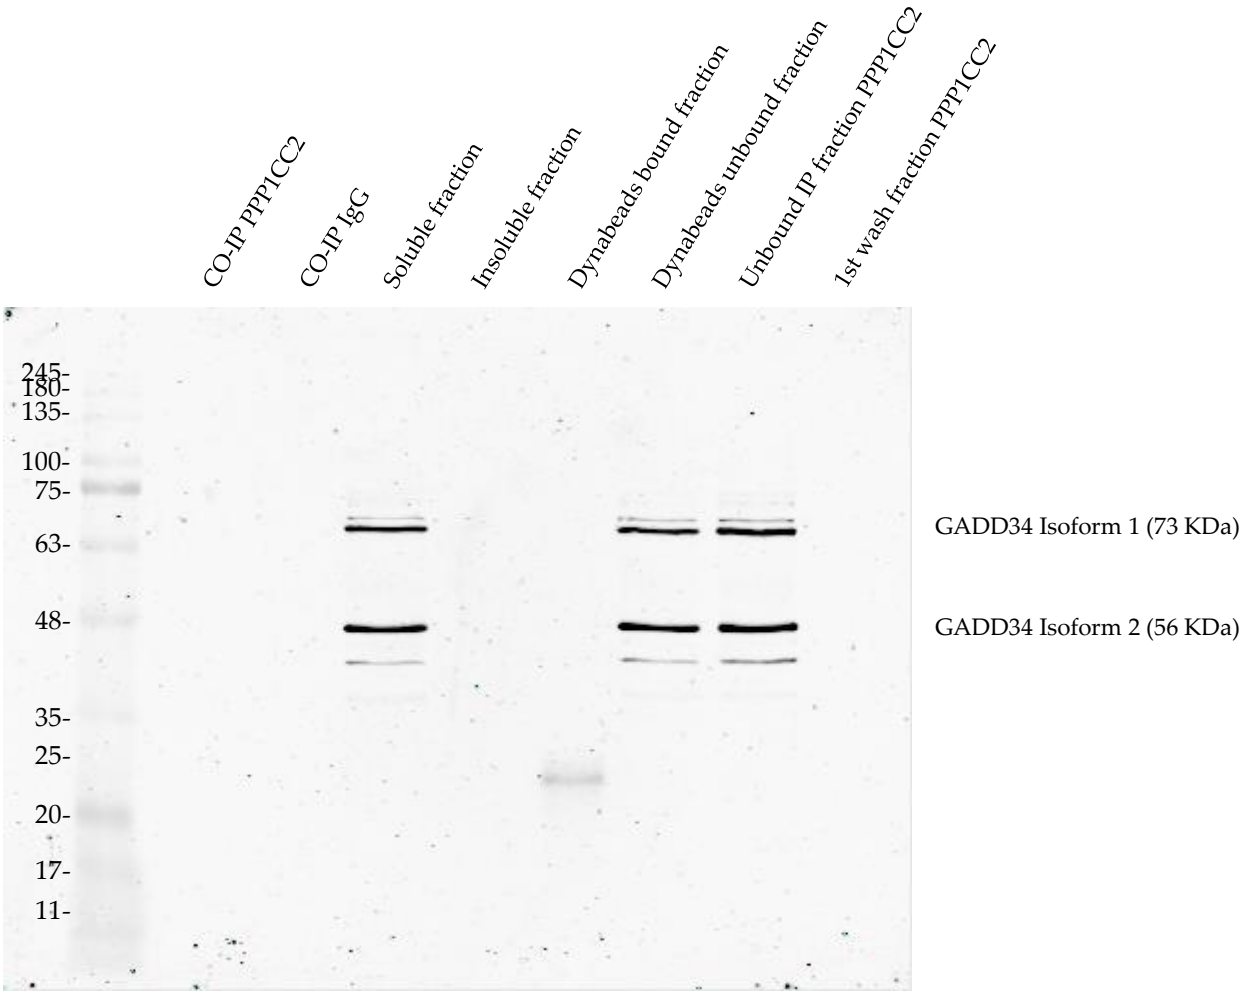

Supplement: s1 [file s1]
