# Supplementary material for: First Insights on the Presence of the Unfolded Protein Response in Human Spermatozoa
Source: MDPI journal article supplement (doi:10.3390/ijms20215518), 2019-11-05
Supplement: s1 [file s1]

Figure 4

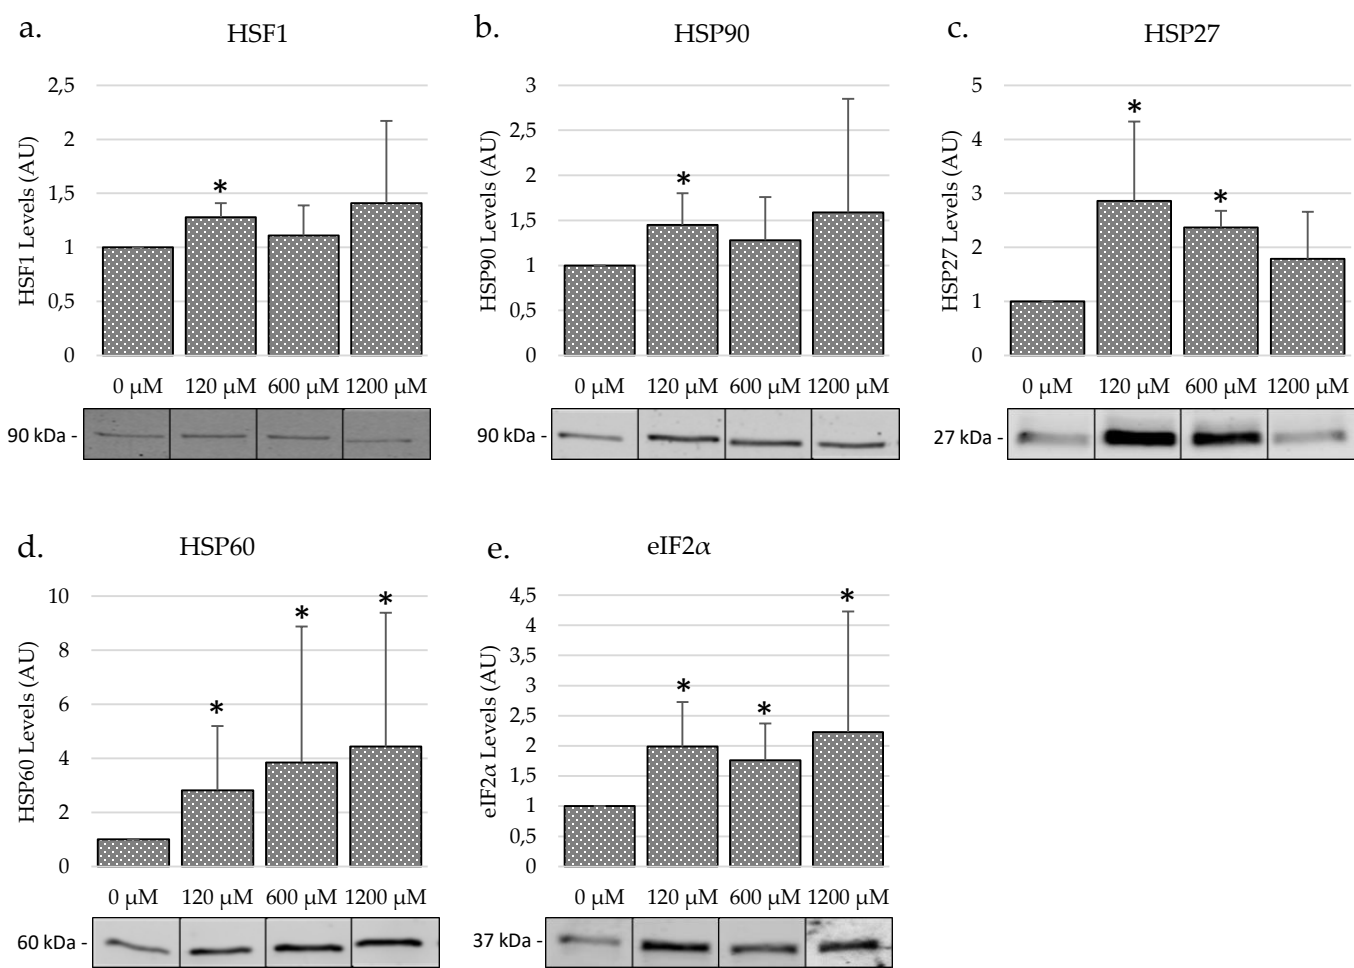

Figure 4 – Original Images

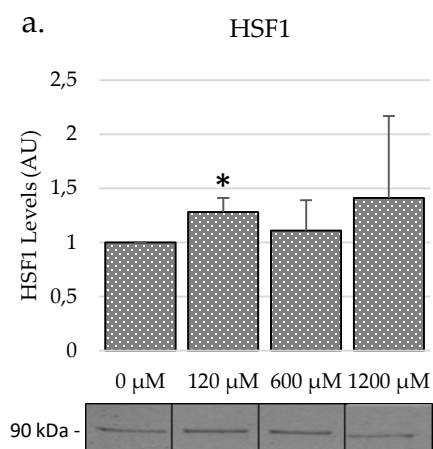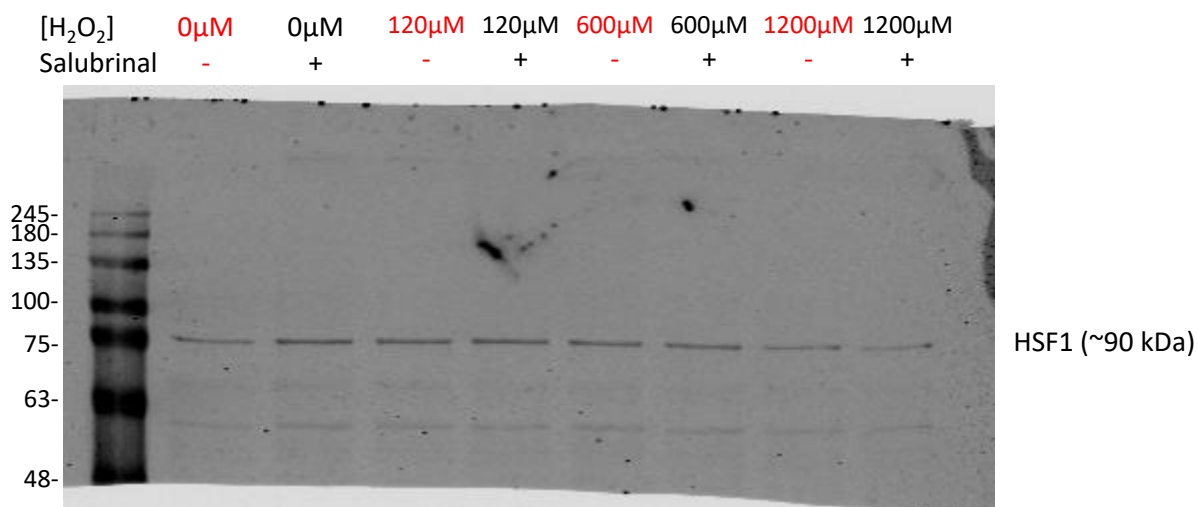

Note: Only the results of red conditions are presented and discussed in the paper.

Figure 4 – Original Images

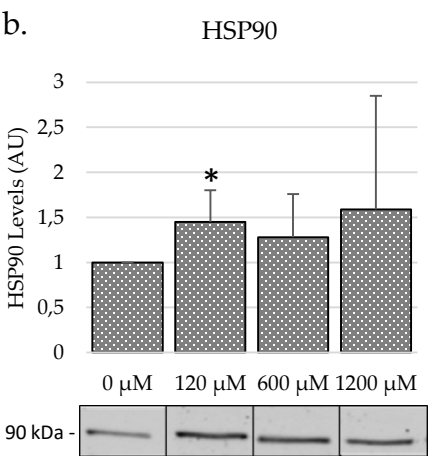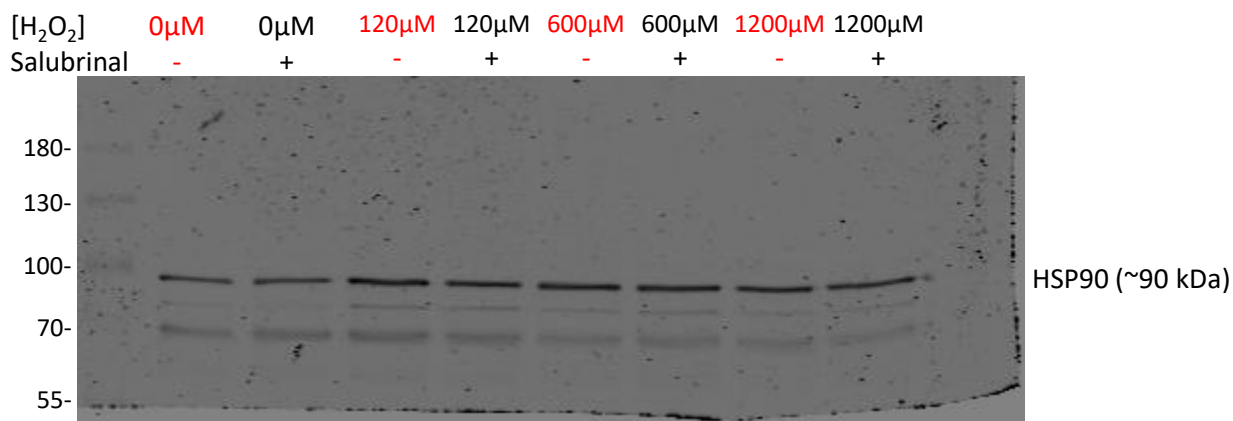

Note: Only the results of red conditions are presented and discussed in the paper.

Figure 4 – Original Images

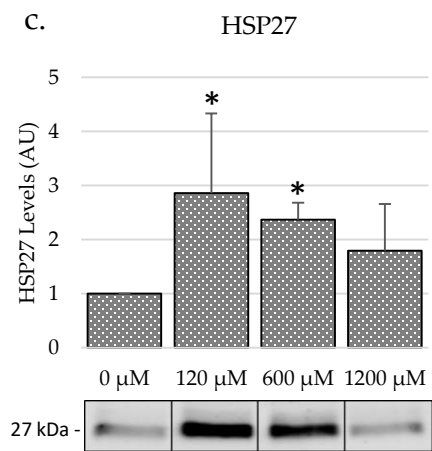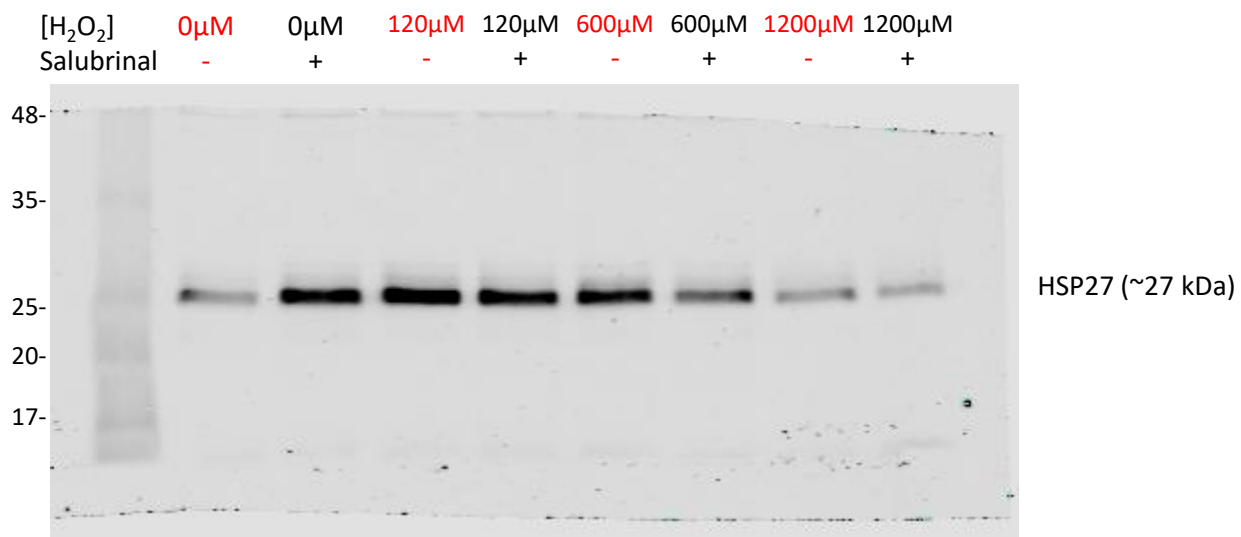

Note: Only the results of red conditions are presented and discussed in the paper.

Figure 4 – Original Images

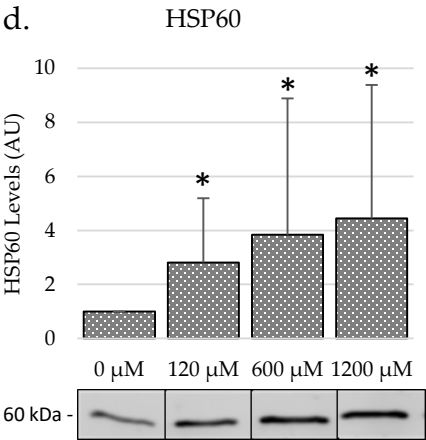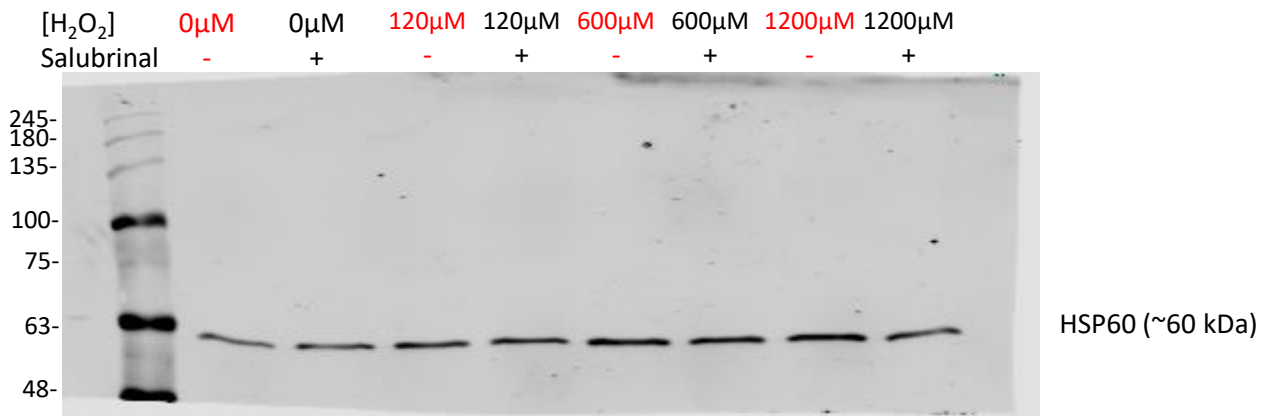

Note: Only the results of red conditions are presented and discussed in the paper.

Figure 4 – Original Images

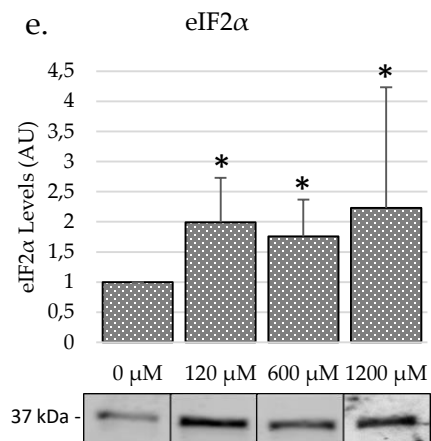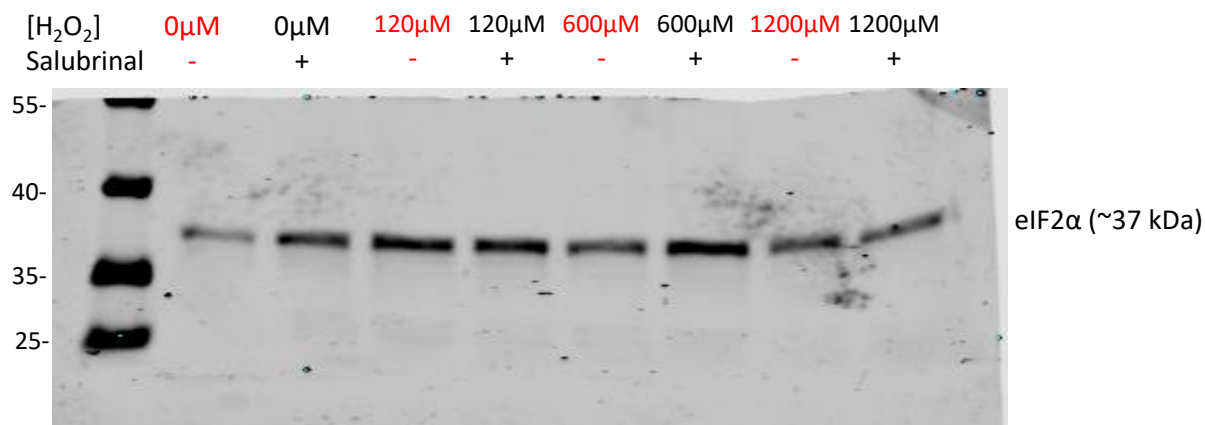

Note: Only the results of **red conditions** are presented and discussed in the paper.
