# Supplementary figures and images for: First Insights on the Presence of the Unfolded Protein Response in Human Spermatozoa
Source: MDPI journal article supplement (doi:10.3390/ijms20215518), 2019-11-05

Figure 2 – Positive control (**testis**)

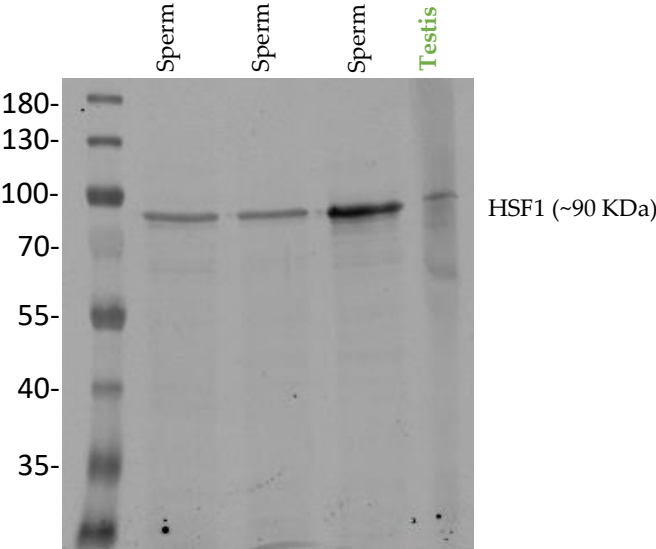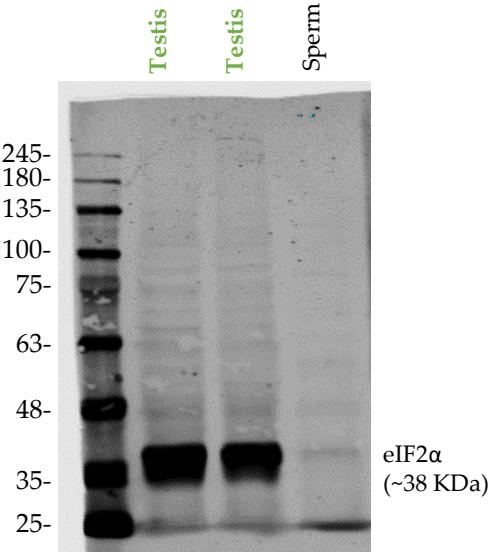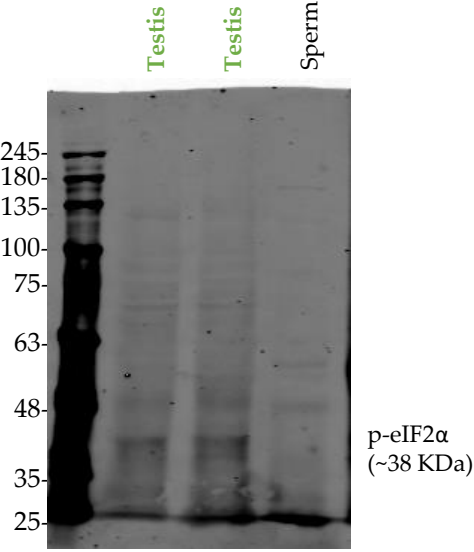

Supplement: s1 [file s1]
